Emotion dysregulation, disordered eating, and self-harm

## Emotional dysregulation in childhood and disordered eating and self-harm in adolescence: Prospective associations and mediating pathways

Naomi Warne<sup>1,2</sup>, Jon Heron<sup>1,2</sup>, Becky Mars<sup>1,3</sup>, Francesca Solmi<sup>4</sup>, Lucy Biddle<sup>1,5</sup>, David Gunnell<sup>1,3</sup>, Gemma Hammerton<sup>1,2</sup>, Paul Moran<sup>1,3,5</sup>, Marcus Munafò<sup>2,3,6</sup>, Ian Penton-Voak<sup>3,6</sup>, Andy Skinner<sup>2,7</sup>, Anne Stewart<sup>8,9</sup>, Helen Bould<sup>1,2,10</sup>

<sup>1</sup>Centre for Academic Mental Health, Population Health Sciences, Bristol Medical School, University of Bristol

<sup>2</sup>Medical Research Council Integrative Epidemiology Unit, University of Bristol

<sup>3</sup>NIHR Biomedical Research Centre, University Hospitals Bristol and Weston NHS Foundation Trust, University of Bristol

<sup>4</sup>Division of Psychiatry, University College London

<sup>5</sup>NIHR Applied Research Collaboration West at University Hospitals Bristol and Weston NHS Foundation Trust

<sup>6</sup>School of Psychological Science, University of Bristol

<sup>7</sup>Integrative Cancer Epidemiology Programme, Bristol Medical School, University of Bristol

<sup>8</sup>Department of Psychiatry, University of Oxford

<sup>9</sup>Oxford Health NHS Foundation Trust

<sup>10</sup>Gloucestershire Health and Care NHS Foundation Trust

**Word count: 5842**

**Running head:** Emotional dysregulation, disordered eating, and self-harm

**Conflict of Interest:** all authors declare that they have no conflict of interest

**NOTE:** This preprint reports new research that has not been certified by peer review and should not be used to guide clinical practice.

Emotion dysregulation, disordered eating, and self-harm

## Abstract

**Background:** Emotional dysregulation may be a risk factor for disordered eating and self-harm in young people, but few prospective studies have assessed these associations long-term, or considered potential mediators. We examined prospective relationships between childhood emotional dysregulation and disordered eating and self-harm in adolescence; and social cognition, emotional recognition and being bullied as mediators.

**Methods:** We analysed Avon Longitudinal Study of Parents and Children data on 3453 males and 3481 females. We examined associations between emotional dysregulation at 7 years and any disordered eating and any self-harm at 16 years with probit regression models. We also assessed whether social cognition (7 years), emotional recognition (8 years) and bullying victimisation (11 years) mediated these relationships.

**Results:** Emotional dysregulation at age 7 years was associated with disordered eating (fully adjusted probit B (95% CI) = 0.082 (0.029, 0.134)) and self-harm (fully adjusted probit B (95% CI) = 0.093 (0.036, 0.150)) at age 16 years. There was no evidence of sex interactions or difference in effects between self-harm and disordered eating. Mediation models found social cognition was a key pathway to disordered eating (females 51.2%; males 27.0% of total effect) and self-harm (females 15.7%; males 10.8% of total effect). Bullying victimisation was an important pathway to disordered eating (females 17.1%; males 10.0% of total effect), but only to self-harm in females (15.7% of total effect). Indirect effects were stronger for disordered eating than self-harm.

**Conclusions:** In males and females, emotional dysregulation in early childhood is associated with disordered eating and self-harm in adolescence and may be a useful target for prevention and treatment. Mediating pathways differed by sex and outcome, but social cognition was a key mediating pathway for both disordered eating and self-harm.

**Keywords:** ALSPAC; self-harm; disordered eating; emotional regulation; prospective; mediation

Emotion dysregulation, disordered eating, and self-harm

**Abbreviations:** ALSPAC – Avon Longitudinal Study of Parents and Children

## Emotion dysregulation, disordered eating, and self-harm

### Introduction

Eating disorders affect up to 6% of female adolescents (Smink, Van Hoeken, Oldehinkel, & Hoek, 2014) and are associated with significant morbidity and mortality (Arcelus, Mitchell, Wales, & Nielsen, 2011). Disordered eating behaviours (including fasting, binge-eating and purging) are common (Warne et al., 2021), and associated with negative health and social outcomes, including eating disorders (Kärkkäinen, Mustelin, Raevuori, Kaprio, & Keski-Rahkonen, 2018; Tabler & Utz, 2015). Self-harm in young people is also common and associated with significant morbidity and mortality (Bergen et al., 2012; McManus et al., 2019). Critically, there is high comorbidity between disordered eating and self-harm. Prevalence of self-harm in patients with eating disorders is 14-64% (Cucchi et al., 2016; Svirko & Hawton, 2007); in the community, almost two-thirds of 16-year-old and 24-year-old females reporting self-harm also report disordered eating (Warne et al., 2021). This observed co-occurrence may reflect common aetiological pathways and shared risk factors (Svirko & Hawton, 2007).

Research indicates that emotional dysregulation - the inability to be aware of, accept, regulate, and modify emotional reactions and subsequent behaviours (Gratz & Roemer, 2004) - is linked to both eating disorders and self-harm. Emotional dysregulation is cross-sectionally associated with eating disorders (Lavender et al., 2015; Oldershaw, Lavender, Sallis, Stahl, & Schmidt, 2015) and self-harm (Colmenero-Navarrete, García-Sancho, & Salguero, 2021; Wolff et al., 2019). Some prospective studies have found associations between emotional dysregulation and eating disorders (Henderson et al., 2021; McLaughlin, Hatzenbuehler, Mennin, & Nolen-Hoeksema, 2011; Nolen-Hoeksema, Stice, Wade, & Bohon, 2007) and self-harm in adolescence (Garisch & Wilson, 2015; Robinson et al., 2019; Voon, Hasking, & Martin, 2014; You, Lin, & Leung, 2014; Zhou, Daukantaitė, Lundh, Wångby-Lundh, & Ryde, 2020). However, most of these studies follow-up for a year or less and focus on individual eating disorders/behaviours, or single maladaptive emotional regulation strategies, rather than global deficits.

## Emotion dysregulation, disordered eating, and self-harm

The mechanisms underlying this potential prospective association are unknown. Three potential mediators of the association between emotional dysregulation and subsequent disordered eating and self-harm are social cognition, emotion recognition and bullying victimisation. Problems with social cognition (cognitive processes underlying social interaction such as perception, interpretation, and generation of responses to other people's behaviours and mental states (Green et al., 2008)) in childhood are associated with higher subsequent rates of adolescent suicide attempts (Culpin et al., 2018), and disordered eating (Solmi et al., 2020). Cross-sectional studies find that people who self-harm (Seymour et al., 2016) and who have eating disorders (Caglar-Nazali et al., 2014) have increased difficulties with facial emotion recognition, and adolescents with dysregulated mood, a concept similar to emotional dysregulation, are less accurate than controls at identifying facial emotions (Rich et al., 2008). Emotional dysregulation is prospectively associated with bullying victimisation (Winsper, Hall, Strauss, & Wolke, 2017) and being bullied is associated with increased risk of subsequent self-harm (Bowes, Wolke, Joinson, Lereya, & Lewis, 2014; Lereya et al., 2013) and disordered eating (Copeland et al., 2015). Difficulties with social cognition and emotion recognition may therefore represent distinct mediating pathways from emotional dysregulation to eating disorders and/or self-harm, by, in turn, increasing a child's susceptibility to bullying victimisation. Investigation of these factors as mediators has the potential to identify early modifiable targets and facilitate development of interventions to prevent both self-harm and eating disorders.

Our aims were to investigate the (1) association between emotional dysregulation in childhood and disordered eating and self-harm in adolescence in a population-based cohort and (2) extent to which social cognition, emotion recognition and being bullied mediate these associations.

## Methods

The research protocol was preregistered on Open Science Framework (<https://osf.io/43kcg/>).

Deviations from the protocol are listed in Appendix S1.

## Emotion dysregulation, disordered eating, and self-harm

### Study design and participants

We used data from a prospective birth cohort: the Avon Longitudinal Study of Parents and Children (ALSPAC) (Boyd et al., 2013; Fraser et al., 2013). Pregnant women with an expected delivery date between 1<sup>st</sup> April 1991 and 31<sup>st</sup> December 1992 living in the Avon area of Bristol, UK, were invited to take part. Of the 14,541 pregnancies, there were 13,988 children alive at 1 year of age.

### Ethical Considerations

Ethical approval for the study was obtained from the ALSPAC Ethics and Law Committee and the Local Research Ethics Committees. Informed consent for the use of data collected via questionnaires and clinics was obtained from participants following the recommendations of the ALSPAC Ethics and Law Committee at the time. The study website contains details of all the available data through a fully searchable data dictionary and variable search tool:

<http://www.bristol.ac.uk/alspac/researchers/our-data/>. We used a sample of 6,934 children (3,453 males, 3,481 females) from the core sample (Figure S1).

### Exposure

Mothers reported on their child's emotional dysregulation (mean age 6 years 9 months) over the past 6 months using the Strengths and Difficulties Questionnaire-Dysregulation Profile (SDQ-DP) (Holtmann, Becker, Banaschewski, Rothenberger, & Roessner, 2011). This is a reliable, valid, and stable measure of emotional dysregulation (Deutz et al., 2018) composed of emotional, hyperactivity and conduct SDQ subscales (Table S1) (Goodman, 2001). To avoid small parameter estimates, and additional decimal places in quoted values, this variable was rescaled by dividing all values by 4, close to the standard deviation of the SDQ-DP in this sample. We chose not to standardize the variable as the SD would be expected to differ between complete case and imputed samples.

## Emotion dysregulation, disordered eating, and self-harm

### Outcomes

Past-year self-harm and disordered eating were assessed via self-report questionnaire during adolescence (mean age 16 years 8 months).

#### *Disordered eating*

Questions were adapted from the Youth Risk Behaviour Surveillance System (Kann et al., 1996).

Participants were asked about the presence and frequency of fasting (not eating for at least a day to lose weight/avoid gaining weight), purging (vomiting or taking laxatives/other medications to lose weight/avoid gaining weight), binge-eating (eating a large amount of food in a short amount of time, with a sense of loss of control), and excessive exercise (exercise in order to lose weight/avoid gaining weight that routinely interfered with daily routine or work) (Table S2). Our outcome was *any disordered eating* (fasting, purging, binge-eating, or excessive exercise at any frequency in the past year).

#### *Self-harm*

We used two questions adapted from the Child and Adolescent Self-Harm in Europe study (Madge et al., 2008): whether the adolescent had hurt themselves on purpose (e.g., taking an overdose of pills or cutting themselves) and the last time they did so. Our outcome was *any self-harm* (regardless of suicidal intent) in the last year (Table S2).

### Mediators

Social cognition was measured using maternal reports on the Social and Communication Disorders Checklist (Skuse, Mandy, & Scourfield, 2005) at mean age 7 years 8 months. Emotion recognition was measured using the Diagnostic Assessment of Non-Verbal Accuracy (Nowicki & Duke, 1994) at mean age 8 years 8 months. We used the total number of facial emotions incorrectly identified (Reed et al., 2021). For bullying victimisation, we used the summed score of bullying behaviours (Table S3) reported by participants at mean age 12 years 10 months on the Bullying and Friendship

## Emotion dysregulation, disordered eating, and self-harm

Interview Schedule (Wolke, Woods, Stanford, & Schulz, 2001). Further details available in Appendix S2.

### Confounders

Potential confounders of the paths between exposure, mediators and outcomes included sex (recorded at birth), socioeconomic disadvantage, maternal mental health, and child general cognitive ability. We also considered Body Mass Index (BMI), at age 12 years 10 months, to be an intermediate confounder in mediation analyses. Details on confounder measurement and coding are available in Appendix S2.

### Statistical methods

We used a Structural Equation Modelling framework and the Weighted Least Squares estimator (WLSMV) in Mplus v8.3 (Muthén & Muthén, 2017).

### *Prospective associations*

First, we used bivariate probit regression to determine associations between emotional dysregulation and the pair of correlated binary outcomes: disordered eating and self-harm. Wald tests were used to test whether 1) there was an overall association between emotional dysregulation and both outcomes, 2) the magnitude of the exposure-outcome effect differed between outcomes, and 3) interactions with sex. We sequentially adjusted for potential confounders. Probit coefficients can be interpreted as the effect that a one-unit increase in exposure has on the predicted z-score of the probability of the outcome. To aid interpretation, we derived marginal effects from the fully adjusted model and produced a margins plot showing how predicted probability of each outcome would be expected to vary across the observed range of emotional dysregulation.

### *Mediating pathways*



## Emotion dysregulation, disordered eating, and self-harm

Secondly, we extended the model, incorporating social cognition, emotion recognition and bullying victimisation as potential mediators (Figure 1). For this model, the sample was stratified to permit all paths to vary by sex. We adjusted all direct and indirect paths for confounders and additionally adjusted for the intermediate confounding effect of low or high BMI. As paths through BMI were not of substantive interest, indirect effect estimates for these specific paths were combined with those related to the three mediators of interest, or the direct effect, as appropriate (Figure S2).

Indirect paths were quantified with the product-of-coefficients method, facilitated using probit regression for all binary/categorical dependent variables (MacKinnon, Lockwood, Brown, Wang, & Hoffman, 2007). We employed bootstrapping with 1000 bootstrap samples and the bootstrap SEs were used when pooling across imputed samples (“Rubin’s rules”). We express indirect effects as percentages of total effect. Finally, we explored associations for (a) each mediator/outcome pairing, and (b) the exposure and each mediator.

### *Missing data*

We sought to address potential bias due to missing data by using a Fully Conditional Specification approach with `-mi impute chained-` in Stata version 16 (StataCorp, 2019). We used 25 cycles of regression-switching and produced 250 imputed datasets with imputation sample stratified by sex (more information in Appendix S3).

## Results

### Descriptive results

Descriptive statistics for the key variables are presented in Table 1. At age 16, 15.3% females and 5.6% males reported past year self-harm, whereas 33.9% females and 9.4% males reported past year disordered eating. A comparison of observed and imputed samples for all model variables is available in Table S4.

## Emotion dysregulation, disordered eating, and self-harm

### Prospective associations

Table 2 shows probit estimates for the imputed sample. There was modest evidence ( $p=0.019$ ) for a positive association between emotional dysregulation and both outcomes, however estimates increased markedly in magnitude following adjustment for sex. In the fully adjusted model, a one unit increase in our emotional dysregulation scale was associated with a 0.082 (95% CI 0.029, 0.134) increase in z-score for probability of disordered eating and a 0.093 (95% CI 0.036, 0.150) increase in z-score for probability of self-harm (Figure 2). As shown in Table S5, there was little evidence that emotional dysregulation had a differential impact on disordered eating and self-harm (difference in estimates  $p=0.745$ ) and little evidence that the magnitude of associations varied by sex (interaction  $p=0.600$ ). Complete case sample results were consistent with imputed sample results (Table S5).

### Mediating pathways

Estimated indirect effects (Table 3) show marked differences in the proportion of the total effect mediated for each combination of sex and outcome which ranged from 15.7% total indirect effect for self-harm in males, to 62.2% for disordered eating in females.

Social cognition was the dominant mediator between emotional dysregulation and both self-harm and disordered eating, with substantial pathways via social cognition alone, and via both social cognition and bullying. In females, social cognition accounted for 51.2% (46.3%+4.9%) of the total effect of emotional dysregulation on disordered eating, and 15.7% (11.5%+4.2%) for self-harm; whilst in males these figures were lower, at 27.0% (21.0%+6.0%) and 10.8% (8.8%+2.0%) respectively.

In females, mediation via bullying victimisation accounting for 17.1% (12.2%+4.9%+0.0%) of the total effect on disordered eating and 15.7% (11.5%+4.2%+0.0%) of the total effect on self-harm. For males, bullying victimisation accounted for 10.0% (6.0%+4.0%+0.0%) of the total effect on disordered eating but only 4.0% (2.0%+2.0%+0.0%) of the total effect for self-harm.

## Emotion dysregulation, disordered eating, and self-harm

Finally, emotion recognition accounted for a negligible proportion of the total effect for both outcomes in both females and males. Additional analyses (Tables S6 and S7) found that whilst emotion recognition was strongly related to emotional dysregulation (particularly for males) the association between emotion recognition and both self-harm and disordered eating was modest.

## Discussion

Children with higher emotional dysregulation were more likely to report disordered eating and self-harm during adolescence. Mediating pathways differed by sex (females had two dominant indirect effects via social cognition and bullying, whereas males had these two dominant pathways for disordered eating, but only one dominant indirect effect (social cognition) for self-harm). Pathways also differed by outcome, with stronger indirect effects found for disordered eating than self-harm. These results suggest that emotional dysregulation, social cognition, and potentially bullying, may be useful targets to prevent disordered eating and self-harm.

Our findings are consistent with previous literature which has found positive prospective associations between emotional dysregulation and self-harm (Garisch & Wilson, 2015; Robinson et al., 2019; Voon et al., 2014; You et al., 2014; Zhou et al., 2020) and disordered eating (Henderson et al., 2021; McLaughlin et al., 2011; Nolen-Hoeksema et al., 2007). Our study extends these findings to a longer follow up (9 years) from childhood to adolescence, and considers both self-harm and disordered eating, which may share some aetiological factors (Svirko & Hawton, 2007). In combination with previous literature, our findings suggest that interventions targeting emotional dysregulation may be useful for prevention and treatment of eating disorders and self-harm, as it is modifiable at the individual level (Gratz, Weiss, & Tull, 2015). Improving emotion regulation skills may be useful as a universal transdiagnostic preventative intervention for adolescents (Volckaert, Wante, Loeys, Boelens, & Braet, 2021). However, further longitudinal research is needed to understand potential preventative effects for disordered eating and self-harm. Training in emotion regulation skills can be helpful for adults with eating disorders (Davies et al., 2012) and self-harm

## Emotion dysregulation, disordered eating, and self-harm

(DeCou, Comtois, & Landes, 2019) and preliminary evidence suggests it may also be useful in adolescents (Giombini et al., 2021; Kothgassner et al., 2021).

Social cognition was an important mediating pathway for both disordered eating and self-harm, consistent with literature on prospective links between autism spectrum traits and disordered eating (Solmi et al., 2020) and self-harm (Culpin et al., 2018). Our work extends previous findings and suggests that emotional dysregulation may precede these associations. However, we cannot rule out the possibility that social cognition problems measured at age 7 represent earlier differences in social cognition that precede emotional dysregulation. One way to sever the link between emotional dysregulation and subsequent disordered eating and self-harm could be to develop interventions that de-stigmatise atypical social cognition in children. Alternatively, interventions to strengthen social cognition may have a place (Fernández-Sotos et al., 2018). We found stronger indirect effects for disordered eating than for self-harm, suggesting that addressing difficulties with social cognition may be more effective in reducing/preventing disordered eating than self-harm. Further research on associations between difficulties in social cognition and eating patterns is warranted.

Bullying victimisation was also a key mediating pathway for disordered eating and self-harm in females, but only for disordered eating in males. The lack of association in males may have been driven by very weak associations between bullying victimisation and self-harm, and it is possible that bullying victimisation led to alternative negative outcomes in males that were not assessed. Nevertheless, our findings suggest that effective anti-bullying interventions (e.g. in schools (Fraguas et al., 2021)) may be beneficial in preventing disordered eating regardless of sex, and self-harm in females.

In the context of our analysis, emotion recognition was not an important mediator. Emotional dysregulation was associated with emotion recognition, but we did not find strong associations between emotion recognition and either disordered eating or self-harm. It may be that difficulties in recognising specific emotions are more important than overall accuracy.

## Emotion dysregulation, disordered eating, and self-harm

### Strengths and limitations

Strengths include using a large prospective cohort with considerable information on potential confounders and including both self-harm and disordered eating. Limitations include measuring any frequency of disordered eating rather than diagnostic-level frequency or a research diagnosis of eating disorders. This was so we could assess the relationship between emotional dysregulation across a spectrum of potentially impairing eating behaviours that are not always picked up in clinical samples. Our results may not generalise to individuals with eating disorder diagnoses. The sample was mainly white and less socioeconomically disadvantaged, so results may not generalise to other ethnic and socioeconomic groups. Findings on social cognition as a potential mediator should be interpreted cautiously as social cognition was measured close in time to the exposure, and by the same informant, which may have inflated associations. Although we adjusted for several important confounders, it is possible there may be residual confounding.

### Conclusion

Emotional dysregulation in childhood may be an important precursor for adolescent disordered eating and self-harm. Social cognition was a key mediating pathway for both outcomes and sexes and being bullied was important for disordered eating in both males and females, and self-harm in females. Indirect effects were stronger for disordered eating than for self-harm. Findings suggest that emotional dysregulation, social cognition and bullying may be useful targets in the prevention and treatment of disordered eating and self-harm.

Emotion dysregulation, disordered eating, and self-harm

## Key points and relevance

### Key points and relevance

- Few studies have examined associations between childhood emotional dysregulation and adolescent disordered eating/self-harm
- We found emotional dysregulation (7 years) was associated with both self-harm and disordered eating (16 years), but associations did not differ by sex or outcome
- Measuring emotional dysregulation may be a useful way of identifying young people at high risk of developing disordered eating/self-harm and a potential target for interventions
- Social cognition and bullying were important mediating pathways and may be targets for interventions

Emotion dysregulation, disordered eating, and self-harm

## Acknowledgements

We are extremely grateful to all the families who took part in this study, the midwives for their help in recruiting them, and the whole ALSPAC team, which includes interviewers, computer and laboratory technicians, clerical workers, research scientists, volunteers, managers, receptionists, and nurses.

## Funding

This work was supported by funding from the Medical Research Council/Medical Research Foundation (MR/S020292/1).

The UK Medical Research Council and Wellcome (217065/Z/19/Z) and the University of Bristol provide core support for ALSPAC. This publication is the work of the authors and NW, JH and HB will serve as guarantors for the contents of this paper. A comprehensive list of grants funding is available on the ALSPAC website (<http://www.bristol.ac.uk/alspac/external/documents/grant-acknowledgements.pdf>). This research was specifically funded by NIH (MH087786-01) and Wellcome Trust (GR067797MA). Additional funding is detailed in Appendix S4.

## Correspondence to

Dr Helen Bould

University of Bristol, Oakfield House, Oakfield Grove, Bristol, BS82BN

+441173313353

[helen.bould@bristol.ac.uk](mailto:helen.bould@bristol.ac.uk)

## References

- Arcelus, J., Mitchell, A. J., Wales, J., & Nielsen, S. (2011). Mortality rates in patients with anorexia nervosa and other eating disorders: A meta-analysis of 36 studies. *Archives of General Psychiatry*, *68*(7), 724–731.
- Bergen, H., Hawton, K., Waters, K., Ness, J., Cooper, J., Steeg, S., & Kapur, N. (2012). Premature death after self-harm: A multicentre cohort study. *The Lancet*, *380*(9853), 1568–1574.
- Bowes, L., Wolke, D., Joinson, C., Lereya, S. T., & Lewis, G. (2014). Sibling bullying and risk of depression, anxiety, and self-harm: A prospective cohort study. *Pediatrics*, *134*(4), e1032–e1039.
- Boyd, A., Golding, J., Macleod, J., Lawlor, D. A., Fraser, A., Henderson, J., ... Smith, G. D. (2013). Cohort profile: The 'Children of the 90s'-The index offspring of the Avon Longitudinal Study of Parents and Children. *International Journal of Epidemiology*, *42*(1), 111–127.
- Caglar-Nazali, H. P., Corfield, F., Cardi, V., Ambwani, S., Leppanen, J., Olabintan, O., ... Treasure, J. (2014). A systematic review and meta-analysis of “Systems for Social Processes” in eating disorders. *Neuroscience and Biobehavioral Reviews*, *42*, 55–92.
- Colmenero-Navarrete, L., García-Sancho, E., & Salguero, J. M. (2021). Relationship Between Emotion Regulation and Suicide Ideation and Attempt in Adults and Adolescents: A Systematic Review. *Archives of Suicide Research*, 1–34.
- Copeland, W. E., Bulik, C. M., Zucker, N., Wolke, D., Lereya, S. T., & Costello, E. J. (2015). Does childhood bullying predict eating disorder symptoms? A prospective, longitudinal analysis. *International Journal of Eating Disorders*, *48*(8), 1141–1149.
- Cucchi, A., Ryan, D., Konstantakopoulos, G., Stroumpa, S., Kaçar, A. S., Renshaw, S., ... Kravariti, E. (2016). Lifetime prevalence of non-suicidal self-injury in patients with eating disorders: A



Emotion dysregulation, disordered eating, and self-harm

- systematic review and meta-analysis. *Psychological Medicine*, 46(7), 1345–1358.
- Culpin, I., Mars, B., Pearson, R. M., Golding, J., Heron, J., Bubak, I., ... Rai, D. (2018). Autistic Traits and Suicidal Thoughts, Plans, and Self-Harm in Late Adolescence: Population-Based Cohort Study. *Journal of the American Academy of Child and Adolescent Psychiatry*, 57(5), 313-320.e6.
- Davies, H., Fox, J., Naumann, U., Treasure, J., Schmidt, U., & Tchanturia, K. (2012). Cognitive remediation and emotion skills training for anorexia nervosa: An observational study using neuropsychological outcomes. *European Eating Disorders Review*, 20(3), 211–217.
- DeCou, C. R., Comtois, K. A., & Landes, S. J. (2019). Dialectical Behavior Therapy Is Effective for the Treatment of Suicidal Behavior: A Meta-Analysis. *Behavior Therapy*, 50(1), 60–72.
- Deutz, M. H. F., Shi, Q., Vossen, H. G. M., Huijding, J., Prinzie, P., Deković, M., ... Woltering, S. (2018). Evaluation of the Strengths and Difficulties Questionnaire-Dysregulation Profile (SDQ-DP). *Psychological Assessment*, 30(9), 1174–1185.
- Fernández-Sotos, P., Torio, I., Fernández-Caballero, A., Navarro, E., González, P., Dompablo, M., & Rodríguez-Jimenez, R. (2018). Social cognition remediation interventions: A systematic mapping review. *PLoS ONE*, 14(6), e0218720.
- Fraguas, D., Díaz-Caneja, C. M., Ayora, M., Durán-Cutilla, M., Abregú-Crespo, R., Ezquiaga-Bravo, I., ... Arango, C. (2021). Assessment of School Anti-Bullying Interventions: A Meta-analysis of Randomized Clinical Trials. *JAMA Pediatrics*, 175(1), 44–45.
- Fraser, A., Macdonald-Wallis, C., Tilling, K., Boyd, A., Golding, J., Davey smith, G., ... Lawlor, D. A. (2013). Cohort profile: The avon longitudinal study of parents and children: ALSPAC mothers cohort. *International Journal of Epidemiology*, 42(1), 97–110.
- Garisch, J. A., & Wilson, M. S. (2015). Prevalence, correlates, and prospective predictors of non-suicidal self-injury among New Zealand adolescents: Cross-sectional and longitudinal survey data. *Child and Adolescent Psychiatry and Mental Health*, 9(1), 1–11.

Emotion dysregulation, disordered eating, and self-harm

- Giombini, L., Nesbitt, S., Kusosa, R., Fabian, C., Easter, A., & Tchanturia, K. (2021). Adapted emotion skills training group for young people with anorexia nervosa: A mixed-methods evaluation. *Neuropsychiatrie*, 35(2), 76–83.
- Goodman, R. (2001). Psychometric properties of the strengths and difficulties questionnaire. *Journal of American Academy of Child and Adolescent Psychiatry*, 40(11), 1337–1345.
- Gratz, K. L., & Roemer, L. (2004). Multidimensional Assessment of Emotion Regulation and Dysregulation: Development, Factor Structure, and Initial Validation of the Difficulties in Emotion Regulation Scale. *Journal of Psychopathology and Behavioral Assessment*, 26(1), 41–54.
- Gratz, K. L., Weiss, N. H., & Tull, M. T. (2015). Examining emotion regulation as an outcome, mechanism, or target of psychological treatments. *Current Opinion in Psychology*, 3, 85–90.
- Green, M. F., Penn, D. L., Bentall, R., Carpenter, W. T., Gaebel, W., Gur, R. C., ... Heinssen, R. (2008). Social cognition in schizophrenia: An NIMH workshop on definitions, assessment, and research opportunities. *Schizophrenia Bulletin*, 34(6), 1211–1220.
- Henderson, M., Bould, H., Flouri, E., Harrison, A., Lewis, G., Lewis, G., ... Solmi, F. (2021). Association of Emotion Regulation Trajectories in Childhood with Anorexia Nervosa and Atypical Anorexia Nervosa in Early Adolescence. *JAMA Psychiatry*, 78(11), 1249–1257.
- Holtmann, M., Becker, A., Banaschewski, T., Rothenberger, A., & Roessner, V. (2011). Psychometric validity of the strengths and difficulties questionnaire-dysregulation profile. *Psychopathology*, 44(1), 53–59.
- Kann, L., Warren, C. W., Harris, W. A., Collins, J. L., Williams, B. I., Ross, J. G., & Kolbe, L. J. (1996). Youth Risk Behavior Surveillance- United States, 1995. *Journal of School Health*, 66(10), 365–377.
- Kärkkäinen, U., Mustelin, L., Raevuori, A., Kaprio, J., & Keski-Rahkonen, A. (2018). Do Disordered

Emotion dysregulation, disordered eating, and self-harm

Eating Behaviours Have Long-term Health-related Consequences? *European Eating Disorders Review*, 26(1), 22–28.

Kothgassner, O. D., Goreis, A., Robinson, K., Huscsava, M. M., Schmahl, C., & Plener, P. L. (2021).

Efficacy of dialectical behavior therapy for adolescent self-harm and suicidal ideation: A systematic review and meta-analysis. *Psychological Medicine*, 51(7), 1057–1067.

Lavender, J. M., Wonderlich, S. A., Engel, S. G., Gordon, K. H., Kaye, W. H., & Mitchell, J. E. (2015).

Dimensions of emotion dysregulation in anorexia nervosa and bulimia nervosa: A conceptual review of the empirical literature. *Clinical Psychology Review*, 40, 111–122.

Lereya, S. T., Winsper, C., Heron, J., Lewis, G., Gunnell, D., Fisher, H. L., & Wolke, D. (2013). Being

bullied during childhood and the prospective pathways to self-harm in late adolescence. *Journal of the American Academy of Child and Adolescent Psychiatry*, 52(6), 608–618.e2.

MacKinnon, D. P., Lockwood, C. M., Brown, C. H., Wang, W., & Hoffman, J. M. (2007). The

intermediate endpoint effect in logistic and probit regression. *Clinical Trials*, 4(5), 499–513.

Madge, N., Hewitt, A., Hawton, K., Wilde, E. J. De, Corcoran, P., Fekete, S., ... Ystgaard, M. (2008).

Deliberate self-harm within an international community sample of young people: Comparative findings from the Child & Adolescent Self-harm in Europe (CASE) Study. *Journal of Child Psychology and Psychiatry*, 49(6), 667–677.

McLaughlin, K. A., Hatzenbuehler, M. L., Mennin, D. S., & Nolen-Hoeksema, S. (2011). Emotion

dysregulation and adolescent psychopathology: A prospective study. *Behaviour Research and Therapy*, 49, 544–554.

McManus, S., Gunnell, D., Cooper, C., Bebbington, P. E., Howard, L. M., Brugha, T., ... Appleby, L.

(2019). Prevalence of non-suicidal self-harm and service contact in England, 2000–14: repeated cross-sectional surveys of the general population. *The Lancet Psychiatry*, 6(7), 573–581.

Muthén, L. K., & Muthén, B. . (2017). Mplus User's Guide. Los Angeles, CA: Muthén & Muthén.

Emotion dysregulation, disordered eating, and self-harm

- Nolen-Hoeksema, S., Stice, E., Wade, E., & Bohon, C. (2007). Reciprocal relations between rumination and bulimic, substance abuse, and depressive symptoms in female adolescents. *Journal of Abnormal Psychology, 116*(1), 198–207.
- Nowicki, S., & Duke, M. P. (1994). Individual differences in the nonverbal communication of affect: The diagnostic analysis of nonverbal accuracy scale. *Journal of Nonverbal Behavior, 18*(1), 9–35.
- Oldershaw, A., Lavender, T., Sallis, H., Stahl, D., & Schmidt, U. (2015). Emotion generation and regulation in anorexia nervosa: A systematic review and meta-analysis of self-report data. *Clinical Psychology Review, 39*, 83–95.
- Reed, Z. E., Mahedy, L., Jackson, A., Davey Smith, G., Penton-Voak, I., Attwood, A. S., & Munafò, M. R. (2021). Examining the bidirectional association between emotion recognition and social autistic traits using observational and genetic analyses. *Journal of Child Psychology and Psychiatry, 62*(11), 1330–1338.
- Rich, B. A., Grimley, M. E., Schmajuk, M., Blair, K. S., Blair, J. R., & Leibenluft, E. (2008). Face emotion labeling deficits in children with bipolar disorder and severe mood dysregulation. *Development and Psychopathology, 20*(2), 529–546.
- Robinson, K., Garisch, J. A., Kingi, T., Brocklesby, M., O’Connell, A., Langlands, R. L., ... Wilson, M. S. (2019). Reciprocal Risk: the Longitudinal Relationship between Emotion Regulation and Non-suicidal Self-Injury in Adolescents. *Journal of Abnormal Child Psychology, 47*(2), 325–332.
- Seymour, K. E., Jones, R. N., Cushman, G. K., Galvan, T., Puzia, M. E., Kim, K. L., ... Dickstein, D. P. (2016). Emotional face recognition in adolescent suicide attempters and adolescents engaging in non-suicidal self-injury. *European Child and Adolescent Psychiatry, 25*(3), 247–259.
- Skuse, D. H., Mandy, W. P. L., & Scourfield, J. (2005). Measuring autistic traits : heritability , reliability and validity of the Social and Communication Disorders Checklist. *British Journal of Psychiatry, 187*, 568–572.

Emotion dysregulation, disordered eating, and self-harm

- Smink, F. R. E., Van Hoeken, D., Oldehinkel, A. J., & Hoek, H. W. (2014). Prevalence and severity of DSM-5 eating disorders in a community cohort of adolescents. *International Journal of Eating Disorders, 47*(6), 610–619.
- Solmi, F., Bentivegna, F., Bould, H., Mandy, W., Kothari, R., Rai, D., ... Lewis, G. (2020). Trajectories of autistic social traits in childhood and adolescence and disordered eating behaviours at age 14 years: A UK general population cohort study. *Journal of Child Psychology and Psychiatry*.
- StataCorp. (2019). Stata Statistical Software: Release 16. College Station, TX: StataCorp LLC.
- Svirko, E., & Hawton, K. (2007). Self-Injurious Behavior and Eating Disorders: The Extent and Nature of the Association. *Suicide and Life-Threatening Behavior, 37*(4), 409–421.
- Tabler, J., & Utz, R. L. (2015). The influence of adolescent eating disorders or disordered eating behaviors on socioeconomic achievement in early adulthood. *International Journal of Eating Disorders, 48*(6), 622–632.
- Volkaert, B., Wante, L., Loeys, T., Boelens, E., & Braet, C. (2021). The Evaluation of Boost Camp: A Universal School-Based Prevention Program Targeting Adolescent Emotion Regulation Skills. *School Mental Health*.
- Voon, D., Hasking, P., & Martin, G. (2014). Change in emotion regulation strategy use and its impact on adolescent nonsuicidal self-injury: A three-year longitudinal analysis using latent growth modeling. *Journal of Abnormal Psychology, 123*(3), 487–498.
- Warne, N., Heron, J., Mars, B., Moran, P., Stewart, A., Munafò, M., ... Bould, H. (2021). Comorbidity of self-harm and disordered eating in young people: Evidence from a UK population-based cohort. *Journal of Affective Disorders, 282*, 386–390.
- Winsper, C., Hall, J., Strauss, V. Y., & Wolke, D. (2017). Aetiological pathways to Borderline Personality Disorder symptoms in early adolescence: Childhood dysregulated behaviour, maladaptive parenting and bully victimisation. *Borderline Personality Disorder and Emotion*

Emotion dysregulation, disordered eating, and self-harm

*Dysregulation*, 4(1), 1–10.

Wolff, J. C., Thompson, E., Thomas, S. A., Nesi, J., Bettis, A. H., Ransford, B., ... Liu, R. T. (2019).

Emotion dysregulation and non-suicidal self-injury: A systematic review and meta-analysis.

*European Psychiatry*, 59, 25–36.

Wolke, D., Woods, S., Stanford, K., & Schulz, H. (2001). Bullying and victimization of primary school

children in England and Germany: Prevalence and school factors. *British Journal of Psychology*,

92(4), 673–696.

You, J., Lin, M. P., & Leung, F. (2014). A Longitudinal Moderated Mediation Model of Nonsuicidal

Self-injury among Adolescents. *Journal of Abnormal Child Psychology*, 43(2), 381–390.

Zhou, Y., Daukantaitė, D., Lundh, L. G., Wångby-Lundh, M., & Ryde, A. (2020). Adolescents' Emotion

Regulation Strategies Questionnaire: Initial Validation and Prospective Associations With

Nonsuicidal Self-Injury and Other Mental Health Problems in Adolescence and Young

Adulthood in a Swedish Youth Cohort. *Frontiers in Psychiatry*, 11, 1–14.

Emotion dysregulation, disordered eating, and self-harm

Tables

Table 1. Descriptive statistics (imputed sample, n=6,934)

|                                                 | <b>Total sample<br/>(n=6,934)</b> | <b>Males<br/>(n=3,453)</b> | <b>Females<br/>(n=3,481)</b> |
|-------------------------------------------------|-----------------------------------|----------------------------|------------------------------|
|                                                 | <i>Mean or % (SE)</i>             | <i>Mean or % (SE)</i>      | <i>Mean or % (SE)</i>        |
| <i>Exposure</i>                                 |                                   |                            |                              |
| Emotional dysregulation (rescaled) <sup>1</sup> | 1.60 (0.013)                      | 1.69 (0.018)               | 1.52 (0.018)                 |
| <i>Mediators</i>                                |                                   |                            |                              |
| Social communication                            | 2.76 (0.045)                      | 3.16 (0.065)               | 2.36 (0.062)                 |
| Emotion recognition                             | 4.60 (0.034)                      | 4.80 (0.048)               | 4.40 (0.048)                 |
| Bully victimisation                             | 1.81 (0.036)                      | 1.78 (0.051)               | 1.84 (0.049)                 |
| <i>Outcomes</i>                                 |                                   |                            |                              |
| Disordered eating                               | 21.7% (0.68)                      | 9.4% (0.80)                | 33.9% (1.04)                 |
| Self-harm                                       | 10.4% (0.49)                      | 5.6% (0.60)                | 15.3% (0.76)                 |

SE = standard error of the estimated mean or proportion

<sup>1</sup> : emotional dysregulation was rescaled (by a factor of 4) for the analyses

Table 2. Prospective association between childhood emotional dysregulation and adolescent disordered eating and self-harm (imputed sample, n=6,934)

|                                                      | Outcome                                |                                | Wald test (2 d.f.), p-value |
|------------------------------------------------------|----------------------------------------|--------------------------------|-----------------------------|
|                                                      | Disordered eating<br>Probit B (95% CI) | Self-harm<br>Probit B (95% CI) |                             |
| Unadjusted                                           | 0.048 (0.003, 0.094)                   | 0.061 (0.011, 0.111)           | 7.91, 0.0192                |
| Adjusted for sex                                     | 0.095 (0.045, 0.145)                   | 0.086 (0.034, 0.138)           | 20.10, <0.001               |
| Additionally adjusted for socioeconomic disadvantage | 0.086 (0.036, 0.136)                   | 0.086 (0.033, 0.140)           | 17.57, <0.001               |
| Additionally adjusted for maternal mental health     | 0.076 (0.024, 0.127)                   | 0.075 (0.019, 0.131)           | 12.47, 0.002                |
| Fully adjusted for all baseline confounders          | 0.082 (0.029, 0.134)                   | 0.093 (0.036, 0.150)           | 15.95, <0.001               |

Wald test = Omnibus test of the association between exposure and both outcomes



Table 3. Mediating pathways from emotional dysregulation to disordered eating and self-harm (imputed sample, n=6,934)

|                                                             | Males             |            |               |            | Females           |            |               |            |
|-------------------------------------------------------------|-------------------|------------|---------------|------------|-------------------|------------|---------------|------------|
|                                                             | Disordered eating |            | Self-harm     |            | Disordered eating |            | Self-harm     |            |
|                                                             | Probit B (SE)     | % of total | Probit B (SE) | % of total | Probit B (SE)     | % of total | Probit B (SE) | % of total |
| Total effect                                                | 0.100 (0.053)     |            | 0.102 (0.055) |            | 0.082 (0.034)     |            | 0.096 (0.036) |            |
| Direct effect                                               | 0.076 (0.063)     | 76.0%      | 0.085 (0.065) | 83.3%      | 0.030 (0.039)     | 36.6%      | 0.069 (0.042) | 71.9%      |
| Total indirect effect                                       | 0.024 (0.034)     | 24.0%      | 0.016 (0.034) | 15.7%      | 0.051 (0.020)     | 62.2%      | 0.027 (0.022) | 28.1%      |
| Indirect via social cognition alone                         | 0.021 (0.033)     | 21.0%      | 0.009 (0.033) | 8.8%       | 0.038 (0.020)     | 46.3%      | 0.011 (0.022) | 11.5%      |
| Indirect via emotion recognition alone                      | -0.007 (0.004)    | -7.0%      | 0.003 (0.004) | 2.9%       | -0.001<br>(0.001) | -1.2%      | 0.001 (0.002) | 1.0%       |
| Indirect via bullying victimisation alone                   | 0.004 (0.003)     | 4.0%       | 0.002 (0.003) | 2.0%       | 0.010 (0.004)     | 12.2%      | 0.011 (0.005) | 11.5%      |
| Indirect via social cognition and bullying victimisation    | 0.005 (0.004)     | 6.0%       | 0.002 (0.004) | 2.0%       | 0.004 (0.002)     | 4.9%       | 0.004 (0.002) | 4.2%       |
| Indirect via emotion recognition and bullying victimisation | 0.000 (0.000)     | 0.0%       | 0.000 (0.000) | 0.0%       | 0.000 (0.000)     | 0%         | 0.000 (0.000) | 0.0%       |

% of total = percentage of the total effect explained by the pathway. Fully adjusted for all confounders. SE incorporates bootstrapping (1000 iterations) and pooling across 250 imputed datasets.

Figures

Figure 1. Hypothesised model linking emotional dysregulation with bivariate outcomes of self-harm and disordered eating

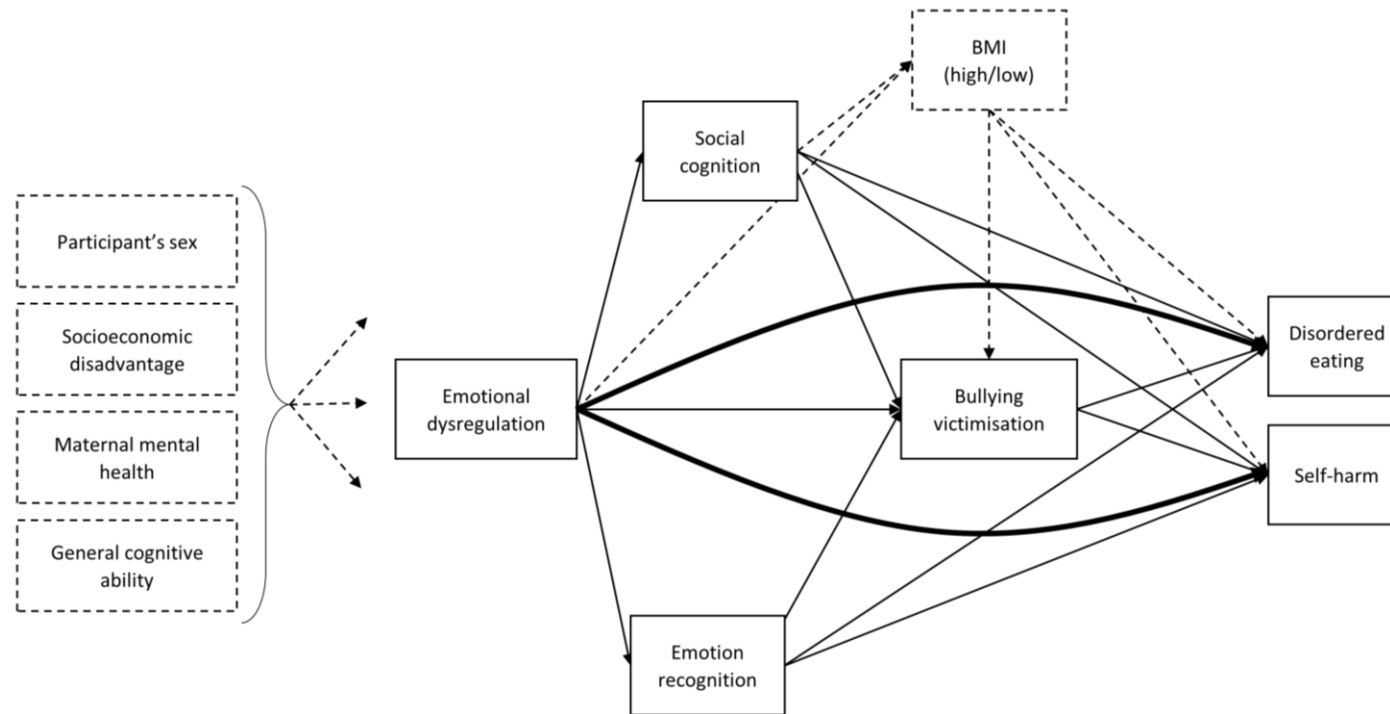

Direct effects are depicted with lines of double thickness. Confounders and pathways involving confounders are depicted by dashed lines. For clarity, some paths between baseline confounders and mediators are not shown.

Figure 2. The predicted probability of self-harm and disordered eating across the range of emotional dysregulation.

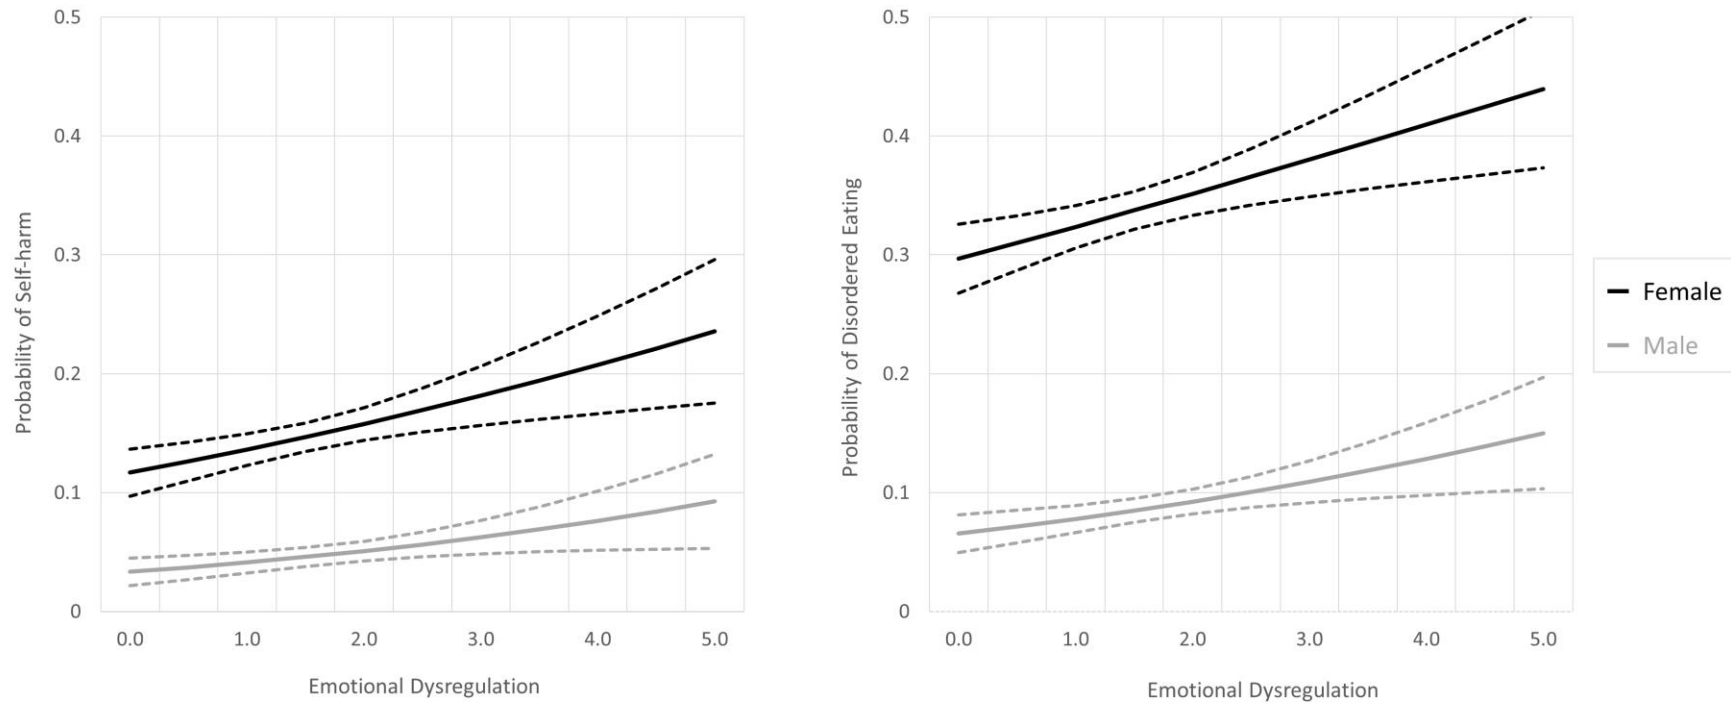

All baseline confounders, other than sex, have been held at their mean levels. Dotted lines indicate 95% CI.
